# Supplementary material for: Oxidative dehydrogenation of propane with nitrous oxide over Fe–MFI prepared by ion-exchange: effect of acid post-treatments
Source: Royal Society of Chemistry journal article supplement (doi:10.1039/c3cy20782j), 2013-01-01
Supplement: c3cy20782j.pdf [file c3cy20782j.pdf]

## Oxidative dehydrogenation of propane with nitrous oxide over Fe-MFI prepared by ion-exchange: Effect of acid post-treatments

Guangjun Wu, Fei Hei, Naijia Guan, Landong Li\*

*Key Laboratory of Advanced Energy Materials Chemistry (Ministry of Education),*

*College of Chemistry, Nankai University, Tianjin 300071, P.R. China*

\*Corresponding author

Tel./fax: +86-22-2350-0341

E-mail: [lild@nankai.edu.cn](mailto:lild@nankai.edu.cn)

**Table S1** Physicochemical properties of Fe-zeolite samples under study

| Fe-zeolite | Zeolite host | Si/Al <sup>a</sup> | Fe (%) | Fe/Al <sup>a</sup> | S <sub>BET</sub> (m <sup>2</sup> /g) |
|------------|--------------|--------------------|--------|--------------------|--------------------------------------|
| Fe-FAU     | H-USY        | 11.9               | 1.82   | 0.23               | 502                                  |
| Fe-MOR     | H-Modenite   | 12.5               | 1.59   | 0.21               | 368                                  |
| Fe-BEA     | H-Beta       | 13.4               | 1.96   | 0.26               | 497                                  |
| Fe-FER     | H-ZSM-35     | 13.6               | 1.44   | 0.20               | 361                                  |
| Fe-MFI     | H-ZSM-5      | 12.5               | 1.67   | 0.22               | 406                                  |

<sup>a</sup> molar ratio

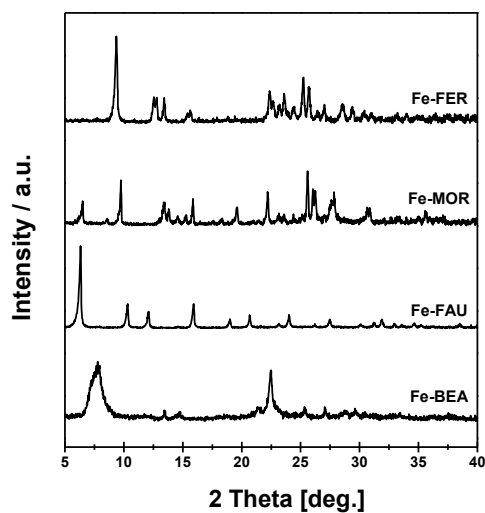

**Figure S1** XRD patterns of Fe-zeolites employed in this study

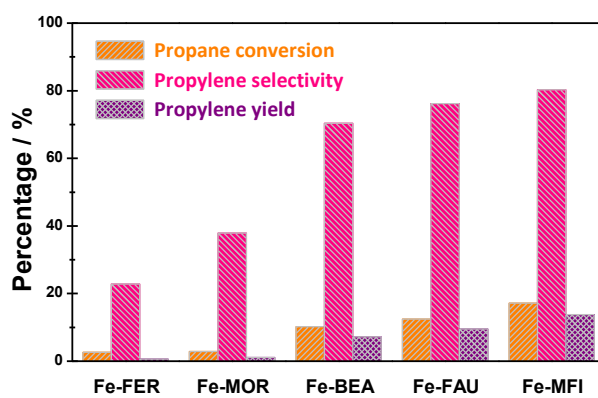

**Figure S2** ODHP with nitrous oxide catalyzed by different Fe-zeolites at 673 K

Reaction conditions: 7.5% C<sub>3</sub>H<sub>8</sub>, 15% N<sub>2</sub>O and He balance; GHSV = 15, 000 h<sup>-1</sup>
